# Supplementary material
Source: Springer Nature journal article supplement (https://www.springermedizin.de/resource/supplementary/12891_2013_1919_MOESM1_ESM.pdf/9508774)

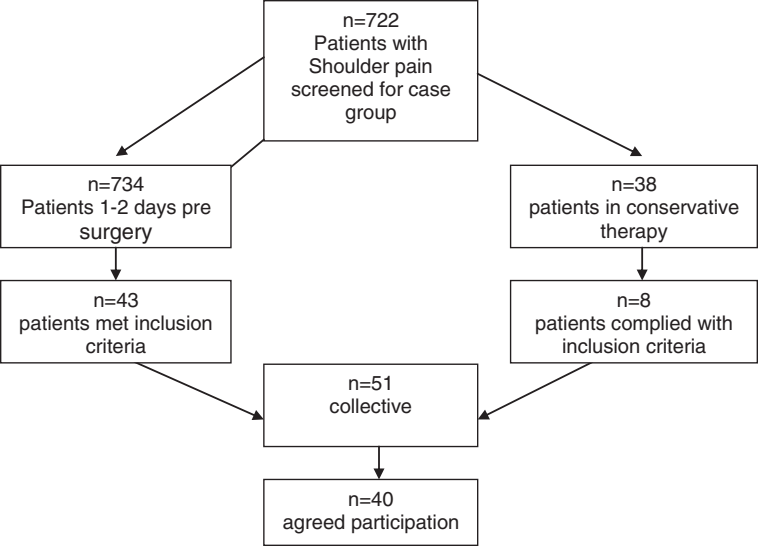

Supplement: MOESM1 [file 9508774]
